# Supplementary material for: Does digitalization promote green innovation quality? evidence from chinese manufacturing firms
Source: Research Square preprint supplement (doi:10.21203/rs.3.rs-7583698/v1), 2025-10-13
Supplement: Supplementary file 1 [file 07074f1f0b1c5a55608186e4.docx]

Table 8 Lagged regression results of core explanatory variables.

|  | Model (16) | Model (17) |
| --- | --- | --- |
| Variables | GQ | GQ |
| L2DI | 0.116** | 0.0975* |
|  | (1.98) | (1.68) |
| Size |  | 6.943** |
|  |  | (2.27) |
| Age |  | -1.882 |
|  |  | (-0.19) |
| LEV |  | -9.237 |
|  |  | (-1.24) |
| ROA |  | -14.48 |
|  |  | (-1.56) |
| Growth |  | -0.979 |
|  |  | (-0.94) |
| SOE |  | -10.97 |
|  |  | (-1.12) |
| _cons | 1.587 | -140.4* |
|  | (0.82) | (-1.86) |
| N | 1853 | 1853 |
| Year | Yes | Yes |
| Id | Yes | Yes |
| r2 | 0.105 | 0.124 |

Notes：*, **, and *** indicate that they pass the test at the levels of 10%, 5%, and 1%, respectively.
