# Supplementary material for: Does digitalization promote green innovation quality? evidence from chinese manufacturing firms
Source: Research Square preprint supplement (doi:10.21203/rs.3.rs-7583698/v1), 2025-10-13
Supplement: Supplementary file 2 [file 0abb5bee7d08ce8e1ac7f3dd.docx]

Table 1 Descriptive statistics

| VARIABLES | N | mean | sd | min | max |
| --- | --- | --- | --- | --- | --- |
| GQ | 3,114 | 9.705 | 22.37 | 0 | 157 |
| DI | 3,114 | 15.05 | 27.22 | 0 | 157 |
| LDI | 2,375 | 13.96 | 26.46 | 0 | 157 |
| RD | 3,114 | 218.3 | 445.3 | 0 | 3,018 |
| Female | 3,114 | 17.59 | 10.59 | 0 | 47.06 |
| Subsidy | 3,114 | 0.426 | 1.734 | 0 | 43.79 |
| Size | 3,114 | 22.58 | 1.294 | 20.35 | 26.02 |
| Age | 3,114 | 2.212 | 0.697 | 0.693 | 3.296 |
| LEV | 3,114 | 0.433 | 0.178 | 0.0845 | 0.791 |
| ROA | 3,114 | 0.0467 | 0.0564 | -0.152 | 0.223 |
| Growth | 3,114 | 0.168 | 0.334 | -0.409 | 2.028 |
| SOE | 3,114 | 0.369 | 0.483 | 0 | 1 |
