# Supplementary material for: Does digitalization promote green innovation quality? evidence from chinese manufacturing firms
Source: Research Square preprint supplement (doi:10.21203/rs.3.rs-7583698/v1), 2025-10-13
Supplement: Supplementary file 3 [file 7080e1313cd4edc34044e61b.docx]

Table 6 Results of the mediation mechanisms

|  | Model (9) | Model (10) | Model (11) |
| --- | --- | --- | --- |
| Variables | GQ | RD | GQ |
| LDI | 0.107** | 2.154* | 0.0226 |
|  | (1.97) | (1.94) | (0.63) |
| RD |  |  | 0.0393*** |
|  |  |  | (7.10) |
| Size | 7.107** | 149.8*** | 1.222 |
|  | (2.43) | (4.03) | (0.62) |
| Age | -5.302 | -41.33 | -3.679 |
|  | (-0.81) | (-0.45) | (-0.81) |
| LEV | -5.618 | -179.0 | 1.412 |
|  | (-0.88) | (-1.63) | (0.32) |
| ROA | -14.54 | -150.7 | -8.616 |
|  | (-1.57) | (-1.02) | (-1.23) |
| Growth | -1.113 | -19.98 | -0.329 |
|  | (-1.25) | (-1.43) | (-0.47) |
| SOE | -5.299 | -109.5* | -0.998 |
|  | (-0.67) | (-1.71) | (-0.18) |
| _cons | -143.8** | -3045.7*** | -24.21 |
|  | (-2.15) | (-3.67) | (-0.53) |
| Bootstrap  test  the confidence interval | [0.0004503,0.0002247] | | |
| N | 2375 | 2375 | 2375 |
| Year | Yes | Yes | Yes |
| Id | Yes | Yes | Yes |
| r2 | 0.142 | 0.153 | 0.459 |

Notes：*, **, and *** indicate that they pass the test at the levels of 10%, 5%, and 1%, respectively.
