# Supplementary material for: Does digitalization promote green innovation quality? evidence from chinese manufacturing firms
Source: Research Square preprint supplement (doi:10.21203/rs.3.rs-7583698/v1), 2025-10-13
Supplement: Supplementary file 4 [file 770019b9336c4124cc8733ec.docx]

Table 4 Results of the moderating effect of TMT female ratio

|  | Model (5) | Model (6) |
| --- | --- | --- |
| Variables | GQ | |
| LDI | 0.1077** | 0.1533** |
|  | (1.9921) | (2.4396) |
| Female | -0.0835 | -0.0933 |
|  | (-0.7636) | (-0.8521) |
| Female×LDI |  | -0.0078** |
|  |  | (-2.3577) |
| Size | 7.0475** | 6.8055** |
|  | (2.4093) | (2.4412) |
| Age | -5.0073 | -4.2004 |
|  | (-0.7827) | (-0.6761) |
| LEV | -5.3887 | -7.6529 |
|  | (-0.8408) | (-1.1656) |
| ROA | -14.2281 | -16.5967* |
|  | (-1.5203) | (-1.7209) |
| Growth | -1.1141 | -0.9844 |
|  | (-1.2316) | (-1.0643) |
| SOE | -5.6293 | -5.2025 |
|  | (-0.7117) | (-0.6534) |
| _cons | -1.4e+02** | -1.4e+02** |
|  | (-2.1099) | (-2.1028) |
| N | 2375 | 2375 |
| Year | Yes | Yes |
| Id | Yes | Yes |
| r2 | 0.1432 | 0.1522 |

Notes：*, **, and *** indicate that they pass the test at the levels of 10%, 5%, and 1%, respectively.
