# Supplementary material for: Does digitalization promote green innovation quality? evidence from chinese manufacturing firms
Source: Research Square preprint supplement (doi:10.21203/rs.3.rs-7583698/v1), 2025-10-13
Supplement: Supplementary file 5 [file 95cf1aa4d5546698dd88b172.docx]

Table 7 Robustness test results of substitution core variable.

|  | Model (12) | Model (13) | Model (14) | Model (15) |
| --- | --- | --- | --- | --- |
| Variables | GPC | GPC | GQ | GQ |
| LDI | 0.0186** | 0.0192** |  |  |
|  | (2.09) | (2.12) |  |  |
| LDTI |  |  | 0.0930* | 0.0762* |
|  |  |  | (1.94) | (1.67) |
| Size |  | 0.0798 |  | 7.280** |
|  |  | (0.26) |  | (2.48) |
| Age |  | -0.569 |  | -5.092 |
|  |  | (-0.74) |  | (-0.78) |
| LEV |  | -0.102 |  | -5.952 |
|  |  | (-0.09) |  | (-0.93) |
| ROA |  | -2.420 |  | -15.11 |
|  |  | (-1.18) |  | (-1.62) |
| Growth |  | 0.270 |  | -1.158 |
|  |  | (0.93) |  | (-1.31) |
| SOE |  | 0.749 |  | -5.465 |
|  |  | (1.19) |  | (-0.69) |
| _cons | 1.791*** | 0.923 | -1.680 | -147.6** |
|  | (6.26) | (0.14) | (-0.86) | (-2.20) |
| N | 2375 | 2375 | 2375 | 2375 |
| Year | Yes | Yes | Yes | Yes |
| Id | Yes | Yes | Yes | Yes |
| r2 | 0.0560 | 0.0573 | 0.118 | 0.140 |

Notes：*, **, and *** indicate that they pass the test at the levels of 10%, 5%, and 1%, respectively.
