# Supplementary material for: Does digitalization promote green innovation quality? evidence from chinese manufacturing firms
Source: Research Square preprint supplement (doi:10.21203/rs.3.rs-7583698/v1), 2025-10-13
Supplement: Supplementary file 6 [file c683ddf692984ce909553361.docx]

Table 3 Regression result of main effect

|  | Model (1) | Model (2) | Model (3) | Model (4) |
| --- | --- | --- | --- | --- |
| Variables | GQ | | | |
| LDI | 0.0951*** | 0.0875*** | 0.128** | 0.107** |
|  | (4.84) | (4.70) | (2.26) | (1.97) |
| Size |  | 8.963*** |  | 7.107** |
|  |  | (13.70) |  | (2.43) |
| Age |  | -3.912*** |  | -5.302 |
|  |  | (-3.25) |  | (-0.81) |
| LEV |  | -5.754 |  | -5.618 |
|  |  | (-1.57) |  | (-0.88) |
| ROA |  | -15.72** |  | -14.54 |
|  |  | (-2.08) |  | (-1.57) |
| Growth |  | -0.772 |  | -1.113 |
|  |  | (-0.76) |  | (-1.25) |
| SOE |  | -0.895 |  | -5.299 |
|  |  | (-0.55) |  | (-0.67) |
| _cons | -2.856* | -189.3*** | -1.881 | -143.8** |
|  | (-1.94) | (-14.39) | (-0.96) | (-2.15) |
| N | 2375 | 2375 | 2375 | 2375 |
| Year | Yes | Yes | Yes | Yes |
| Id | No | No | Yes | Yes |
| r2 |  |  | 0.122 | 0.142 |

Notes：Standard errors in parentheses; *, **, and *** indicate that they pass the test at the levels of 10%, 5%, and 1%, respectively.
