# Supplementary material for: Does digitalization promote green innovation quality? evidence from chinese manufacturing firms
Source: Research Square preprint supplement (doi:10.21203/rs.3.rs-7583698/v1), 2025-10-13
Supplement: Supplementary file 7 [file d6c1c266481c1e4b326c1df3.docx]

Table 2 Correlation analysis

| Variables | GQ | LDI | *RD* | Female | Subsidy | Size |
| --- | --- | --- | --- | --- | --- | --- |
| GQ | 1 |  |  |  |  |  |
| LDI | 0.128*** | 1 |  |  |  |  |
| RD | 0.692*** | 0.149*** | 1 |  |  |  |
| Female | -0.066*** | 0.134*** | -0.061*** | 1 |  |  |
| Subsidy | 0.387*** | 0.079*** | 0.454*** | -0.050*** | 1 |  |
| Size | 0.411*** | -0.075*** | 0.511*** | -0.268*** | 0.340*** | 1 |
| Age | 0.093*** | -0.104*** | 0.161*** | -0.193*** | 0.102*** | 0.486*** |
| LEV | 0.219*** | -0.094*** | 0.275*** | -0.239*** | 0.140*** | 0.590*** |
| ROA | 0.0100 | -0.0210 | 0.053*** | 0.058*** | 0.051*** | -0.0110 |
| Growth | 0.0130 | -0.0160 | -0.00600 | 0.0150 | 0.00200 | -0.00100 |
| SOE | 0.100*** | -0.135*** | 0.106*** | -0.353*** | 0.083*** | 0.388*** |
| Variables | Age | LEV | ROA | Growth | SOE |  |
| Age | 1 |  |  |  |  |  |
| LEV | 0.317*** | 1 |  |  |  |  |
| ROA | -0.155*** | -0.341*** | 1 |  |  |  |
| Growth | -0.147*** | 0.0260 | 0.313*** | 1 |  |  |
| SOE | 0.502*** | 0.266*** | -0.098*** | -0.097*** | 1 |  |

Notes：*, **, and *** indicate that they pass the test at the levels of 10%, 5%, and 1%, respectively.
