# Supplementary material for: Does digitalization promote green innovation quality? evidence from chinese manufacturing firms
Source: Research Square preprint supplement (doi:10.21203/rs.3.rs-7583698/v1), 2025-10-13
Supplement: Supplementary file 8 [file e90d13a5071f51c70d25e55b.docx]

Table 5 Results of the moderating effect of government subsidies

|  | Model (7) | Model (8) |
| --- | --- | --- |
| Variables | GQ | |
| LDI | 0.1011* | 0.0928* |
|  | (1.8918) | (1.7942) |
| Subsidy | 0.8949** | 0.8095** |
|  | (2.4165) | (1.9756) |
| Subsidy×LDI |  | 0.0077** |
|  |  | (2.3269) |
| Size | 6.9393** | 6.9137** |
|  | (2.3767) | (2.3590) |
| Age | -4.8339 | -4.7891 |
|  | (-0.7522) | (-0.7446) |
| LEV | -5.4025 | -5.3054 |
|  | (-0.8612) | (-0.8448) |
| ROA | -13.1419 | -13.1591 |
|  | (-1.4906) | (-1.4949) |
| Growth | -1.0756 | -1.0617 |
|  | (-1.2080) | (-1.1974) |
| SOE | -5.1530 | -5.1840 |
|  | (-0.6529) | (-0.6567) |
| _cons | -1.4e+02** | -1.4e+02** |
|  | (-2.1243) | (-2.1090) |
| N | 2375 | 2375 |
| Year | Yes | Yes |
| Id | Yes | Yes |
| r2 | 0.1510 | 0.1524 |

Notes：*, **, and *** indicate that they pass the test at the levels of 10%, 5%, and 1%, respectively.
